# Supplementary material for: Low Fat Yoghurts Produced with Different Protein Levels and Alternative Natural Sweeteners
Source: MDPI journal article supplement (doi:10.3390/foods13020250), 2024-01-12
Supplement: s1 [file s1]

## Supplementary Material

# Low Fat Yoghurts Produced with Different Protein Levels and Alternative Natural Sweeteners

**Lara Campos <sup>1</sup>, Paulina Tuma <sup>2</sup>, Tânia Silva <sup>3</sup>, David Gomes <sup>1,3</sup>, Carlos Dias Pereira <sup>1,3</sup> and Marta H. F. Henriques <sup>1,3\*</sup>**

<sup>1</sup> Research Centre for Natural Resources Environment and Society (CERNAS), Coimbra Agriculture School, Bencanta, 3045-601 Coimbra, Portugal; lara.campos@esac.pt (LC); david@esac.pt (DG); cpereira@esac.pt (CDP);

<sup>2</sup> West Pomeranian University of Technology, Department of Food Technology and Human Nutrition, Szczecin, al. Piastów 42, 71-065 Szczecin, Poland; paulina272@gmail.com (PT);

<sup>3</sup> Polytechnic Institute of Coimbra, Coimbra Agriculture School, Bencanta, 3045-601 Coimbra, Portugal; tania.silva@esac.pt (TS)

\* Correspondence: mhenriques@esac.pt

**Table S1.** pH and titratable acidity (TA, % lactic acid) (mean  $\pm$  standard deviation) of the low-fat, low-protein yoghurts produced with different sweeteners. Different capital letters within the same column represent statistical differences between storage time for each parameter in the same sweetener. Different small letters within the same row represent statistical differences between sweeteners for each parameter in the same storage time ( $p < 0.05$ ).

| Parameter                 | Storage time (days) | Sucrose 6%                     | Stevia 0.03%                  | Agave 4.5%                    | <i>P-value</i>                     |                               |
|---------------------------|---------------------|--------------------------------|-------------------------------|-------------------------------|------------------------------------|-------------------------------|
| <b>pH</b>                 | 1                   | 4.47 $\pm$ 0.01 <sup>Aa</sup>  | 4.46 $\pm$ 0.01 <sup>Aa</sup> | 4.45 $\pm$ 0.03 <sup>Aa</sup> | Sweetener (A)<br>Time (B)<br>A x B | <0.0001<br><0.0001<br><0.0001 |
|                           | 7                   | 4.34 $\pm$ 0.01 <sup>Bb</sup>  | 4.39 $\pm$ 0.01 <sup>Ba</sup> | 4.32 $\pm$ 0.01 <sup>Bb</sup> |                                    |                               |
|                           | 14                  | 4.29 $\pm$ 0.02 <sup>Cb</sup>  | 4.34 $\pm$ 0.01 <sup>Ca</sup> | 4.25 $\pm$ 0.02 <sup>Cc</sup> |                                    |                               |
|                           | 21                  | 4.23 $\pm$ 0.02 <sup>Dab</sup> | 4.20 $\pm$ 0.01 <sup>Db</sup> | 4.25 $\pm$ 0.01 <sup>Ca</sup> |                                    |                               |
| <b>TA (% lactic acid)</b> | 1                   | 0.67 $\pm$ 0.02 <sup>Ca</sup>  | 0.66 $\pm$ 0.04 <sup>Da</sup> | 0.66 $\pm$ 0.02 <sup>Da</sup> | Sweetener (A)<br>Time (B)<br>A x B | 0.1564<br><0.0001<br>0.0423   |
|                           | 7                   | 0.82 $\pm$ 0.02 <sup>Ba</sup>  | 0.77 $\pm$ 0.02 <sup>Cb</sup> | 0.75 $\pm$ 0.03 <sup>Cb</sup> |                                    |                               |
|                           | 14                  | 0.85 $\pm$ 0.00 <sup>Ba</sup>  | 0.84 $\pm$ 0.02 <sup>Ba</sup> | 0.86 $\pm$ 0.01 <sup>Ba</sup> |                                    |                               |
|                           | 21                  | 0.93 $\pm$ 0.02 <sup>Aa</sup>  | 0.93 $\pm$ 0.01 <sup>Aa</sup> | 0.94 $\pm$ 0.02 <sup>Aa</sup> |                                    |                               |

**Table S2.** pH and titratable acidity (TA, % lactic acid) (mean  $\pm$  standard deviation) of the low-fat, high-protein yoghurts produced with different sweeteners. Different capital letters within the same column represent statistical differences between storage time for each parameter in the same sweetener. Different small letters within the same row represent statistical differences between sweeteners for each parameter in the same storage time ( $p < 0.05$ ).

| Parameter                 | Storage time (days) | Sucrose 6%                     | Stevia 0.04%                   | Xylitol 6%                     | Honey 6%                      | <i>P-value</i>                     |                               |
|---------------------------|---------------------|--------------------------------|--------------------------------|--------------------------------|-------------------------------|------------------------------------|-------------------------------|
| <b>pH</b>                 | 1                   | 4.61 $\pm$ 0.01 <sup>Ab</sup>  | 4.65 $\pm$ 0.01 <sup>Aa</sup>  | 4.66 $\pm$ 0.01 <sup>Aa</sup>  | 4.60 $\pm$ 0.01 <sup>Ab</sup> | Sweetener (A)<br>Time (B)<br>A x B | <0.0001<br><0.0001<br><0.0001 |
|                           | 7                   | 4.54 $\pm$ 0.01 <sup>Bb</sup>  | 4.60 $\pm$ 0.01 <sup>Ba</sup>  | 4.61 $\pm$ 0.01 <sup>Ba</sup>  | 4.55 $\pm$ 0.01 <sup>Bb</sup> |                                    |                               |
|                           | 14                  | 4.48 $\pm$ 0.01 <sup>Cb</sup>  | 4.52 $\pm$ 0.01 <sup>Ca</sup>  | 4.53 $\pm$ 0.01 <sup>Ca</sup>  | 4.46 $\pm$ 0.01 <sup>Cb</sup> |                                    |                               |
|                           | 21                  | 4.42 $\pm$ 0.01 <sup>Da</sup>  | 4.43 $\pm$ 0.01 <sup>Da</sup>  | 4.41 $\pm$ 0.01 <sup>Ca</sup>  | 4.37 $\pm$ 0.01 <sup>Db</sup> |                                    |                               |
| <b>TA (% lactic acid)</b> | 1                   | 0.86 $\pm$ 0.01 <sup>Cba</sup> | 0.96 $\pm$ 0.03 <sup>Ba</sup>  | 0.70 $\pm$ 0.07 <sup>Dc</sup>  | 0.93 $\pm$ 0.03 <sup>Ca</sup> | Sweetener (A)<br>Time (B)<br>A x B | <0.0001<br><0.0001<br><0.0001 |
|                           | 7                   | 0.89 $\pm$ 0.01 <sup>Cc</sup>  | 0.98 $\pm$ 0.01 <sup>Bab</sup> | 0.92 $\pm$ 0.02 <sup>Cbc</sup> | 1.03 $\pm$ 0.03 <sup>Ba</sup> |                                    |                               |
|                           | 14                  | 1.05 $\pm$ 0.02 <sup>Bb</sup>  | 1.01 $\pm$ 0.02 <sup>Bbc</sup> | 0.99 $\pm$ 0.00 <sup>Bc</sup>  | 1.13 $\pm$ 0.03 <sup>Aa</sup> |                                    |                               |
|                           | 21                  | 1.12 $\pm$ 0.03 <sup>Aa</sup>  | 1.15 $\pm$ 0.00 <sup>Aa</sup>  | 1.05 $\pm$ 0.03 <sup>Ab</sup>  | 1.15 $\pm$ 0.02 <sup>Aa</sup> |                                    |                               |

**Table S3.** Color parameters ( $L^*$ ,  $a^*$ ,  $b^*$ ) (mean  $\pm$  standard deviation) of the low-fat, low-protein yoghurts produced with different sweeteners. Different capital letters within the same column represent statistical differences between storage time for each parameter in the same sweetener. Different small letters within the same row represent statistical differences between sweeteners for each parameter in the same storage time ( $p < 0.05$ ).

| Parameter | Storage time (days) | Sucrose 6%                    | Stevia 0.03%                  | Agave 4.5%                    | <i>P-value</i>                     |                              |
|-----------|---------------------|-------------------------------|-------------------------------|-------------------------------|------------------------------------|------------------------------|
| $L^*$     | 1                   | 92.0 $\pm$ 1.2 <sup>Cb</sup>  | 93.4 $\pm$ 0.4 <sup>Ca</sup>  | 92.9 $\pm$ 0.4 <sup>Ba</sup>  | Sweetener (A)<br>Time (B)<br>A x B | <0.0001<br><0.0001<br>0.0007 |
|           | 7                   | 92.4 $\pm$ 0.6 <sup>BCc</sup> | 94.3 $\pm$ 0.2 <sup>Ba</sup>  | 93.4 $\pm$ 0.2 <sup>Bb</sup>  |                                    |                              |
|           | 14                  | 93.7 $\pm$ 0.4 <sup>Ab</sup>  | 95.9 $\pm$ 0.4 <sup>Aa</sup>  | 95.5 $\pm$ 0.3 <sup>Aa</sup>  |                                    |                              |
|           | 21                  | 93.1 $\pm$ 0.6 <sup>ABb</sup> | 93.9 $\pm$ 0.4 <sup>BCa</sup> | 92.8 $\pm$ 0.3 <sup>Bb</sup>  |                                    |                              |
| $a^*$     | 1                   | -3.6 $\pm$ 0.1 <sup>Cb</sup>  | -3.3 $\pm$ 0.1 <sup>Ca</sup>  | -3.3 $\pm$ 0.2 <sup>Ba</sup>  | Sweetener (A)<br>Time (B)<br>A x B | <0.0001<br><0.0001<br>0.8756 |
|           | 7                   | -3.3 $\pm$ 0.2 <sup>Bb</sup>  | -3.0 $\pm$ 0.1 <sup>Ba</sup>  | -3.1 $\pm$ 0.1 <sup>Bab</sup> |                                    |                              |
|           | 14                  | -2.9 $\pm$ 0.2 <sup>Aa</sup>  | -2.7 $\pm$ 0.2 <sup>Aa</sup>  | -2.7 $\pm$ 0.2 <sup>Aa</sup>  |                                    |                              |
|           | 21                  | -3.4 $\pm$ 0.1 <sup>BCb</sup> | -3.1 $\pm$ 0.1 <sup>BCa</sup> | -3.2 $\pm$ 0.2 <sup>Bab</sup> |                                    |                              |
| $b^*$     | 1                   | 5.2 $\pm$ 0.3 <sup>Ab</sup>   | 5.4 $\pm$ 0.2 <sup>Ab</sup>   | 5.8 $\pm$ 0.2 <sup>Aa</sup>   | Sweetener (A)<br>Time (B)<br>A x B | <0.0001<br><0.0001<br>0.3681 |
|           | 7                   | 5.1 $\pm$ 0.2 <sup>Ab</sup>   | 5.2 $\pm$ 0.2 <sup>Ab</sup>   | 5.7 $\pm$ 0.1 <sup>Aa</sup>   |                                    |                              |
|           | 14                  | 4.2 $\pm$ 0.1 <sup>Bb</sup>   | 4.2 $\pm$ 0.2 <sup>Cb</sup>   | 4.8 $\pm$ 0.2 <sup>Ca</sup>   |                                    |                              |
|           | 21                  | 4.4 $\pm$ 0.1 <sup>Bb</sup>   | 4.6 $\pm$ 0.1 <sup>Bb</sup>   | 5.2 $\pm$ 0.2 <sup>Ba</sup>   |                                    |                              |

**Table S4.** Color parameters ( $L^*$ ,  $a^*$ ,  $b^*$ ) (mean  $\pm$  standard deviation) of the low-fat, high-protein yoghurts produced with different sweeteners. Different capital letters within the same column represent statistical differences between storage time for each parameter in the same sweetener. Different small letters within the same row represent statistical differences between sweeteners for each parameter in the same storage time ( $p < 0.05$ ).

| Parameter | Storage time (days) | Sucrose 6%                    | Stevia 0.04%                   | Xylitol 6%                    | Honey 6%                               | <i>P-value</i>                     |                               |
|-----------|---------------------|-------------------------------|--------------------------------|-------------------------------|----------------------------------------|------------------------------------|-------------------------------|
| $L^*$     | 1                   | 91.6 $\pm$ 0.7 <sup>Ba</sup>  | 91.1 $\pm$ 1.0 <sup>Ca</sup>   | 92.0 $\pm$ 0.7 <sup>Aa</sup>  | 91.5 $\pm$ 0.3 <sup>Ba</sup>           | Sweetener (A)<br>Time (B)<br>A x B | <0.0001<br><0.0001<br><0.0001 |
|           | 7                   | 92.4 $\pm$ 0.4 <sup>Ba</sup>  | 93.3 $\pm$ 0.3 <sup>ABa</sup>  | 92.7 $\pm$ 0.6 <sup>Ab</sup>  | 91.2 $\pm$ 0.6 <sup>Bb</sup>           |                                    |                               |
|           | 14                  | 94.0 $\pm$ 0.3 <sup>Aa</sup>  | 94.2 $\pm$ 0.5 <sup>Aa</sup>   | 92.0 $\pm$ 1.3 <sup>Ab</sup>  | 93.7 $\pm$ 0.4 <sup>Aa</sup>           |                                    |                               |
|           | 21                  | 92.1 $\pm$ 0.6 <sup>Bab</sup> | 93.0 $\pm$ 0.4 <sup>Ba</sup>   | 92.2 $\pm$ 0.4 <sup>Aab</sup> | 91.9 $\pm$ 0.5 <sup>Bb</sup>           |                                    |                               |
| $a^*$     | 1                   | -3.7 $\pm$ 0.2 <sup>Aa</sup>  | -3.7 $\pm$ 0.3 <sup>Aa</sup>   | -3.6 $\pm$ 0.2 <sup>Aa</sup>  | -3.5 $\pm$ 0.1 <sup>Aa</sup>           | Sweetener (A)<br>Time (B)<br>A x B | <0.0001<br><0.0001<br><0.0001 |
|           | 7                   | -4.1 $\pm$ 0.3 <sup>Ba</sup>  | -4.1 $\pm$ 0.2 <sup>Ba</sup>   | -4.0 $\pm$ 0.2 <sup>Ba</sup>  | -4.1 $\pm$ 0.2 <sup>Ca</sup>           |                                    |                               |
|           | 14                  | -4.1 $\pm$ 0.1 <sup>BCa</sup> | -4.1 $\pm$ 0.1 <sup>Ba</sup>   | -4.8 $\pm$ 0.2 <sup>Cb</sup>  | -3.9 $\pm$ 0.2 <sup>BCa</sup>          |                                    |                               |
|           | 21                  | -4.4 $\pm$ 0.2 <sup>Cc</sup>  | -3.9 $\pm$ 0.2 <sup>ABab</sup> | -4.1 $\pm$ 0.2 <sup>Bbc</sup> | -3.8 $\pm$ 0.1 <sup>Ba</sup>           |                                    |                               |
| $b^*$     | 1                   | 5.7 $\pm$ 0.2 <sup>Cb</sup>   | 5.9 $\pm$ 0.2 <sup>Cb</sup>    | 5.7 $\pm$ 0.2 <sup>Cb</sup>   | 7.1 $\pm$ 0.1 <sup>D<sup>a</sup></sup> | Sweetener (A)<br>Time (B)<br>A x B | <0.0001<br><0.0001<br>0.0037  |
|           | 7                   | 6.1 $\pm$ 0.2 <sup>Bc</sup>   | 6.5 $\pm$ 0.3 <sup>Bb</sup>    | 6.2 $\pm$ 0.3 <sup>Bbc</sup>  | 7.9 $\pm$ 0.1 <sup>Ca</sup>            |                                    |                               |
|           | 14                  | 8.1 $\pm$ 0.2 <sup>Ab</sup>   | 8.1 $\pm$ 0.2 <sup>Ab</sup>    | 8.0 $\pm$ 0.1 <sup>Ab</sup>   | 9.4 $\pm$ 0.2 <sup>Ba</sup>            |                                    |                               |
|           | 21                  | 8.0 $\pm$ 0.1 <sup>Ab</sup>   | 7.9 $\pm$ 0.2 <sup>Ab</sup>    | 8.0 $\pm$ 0.3 <sup>Ab</sup>   | 9.8 $\pm$ 0.3 <sup>Aa</sup>            |                                    |                               |

**Table S5.** Syneresis index and water holding capacity (mean  $\pm$  standard deviation) of the low-fat, low-protein yoghurts produced with different sweeteners. Different capital letters within the same column represent statistical differences between storage time for each parameter in the same sweetener. Different small letters within the same row represent statistical differences between sweeteners for each parameter in the same storage time ( $p < 0.05$ ).

| Parameter                         | Storage time (days) | Sucrose 6%                    | Stevia 0.03%                 | Agave 4.5%                    | <i>P-value</i>                     |                               |
|-----------------------------------|---------------------|-------------------------------|------------------------------|-------------------------------|------------------------------------|-------------------------------|
| <b>Syneresis index (%)</b>        | 1                   | 4.6 $\pm$ 0.2 <sup>Ba</sup>   | 4.6 $\pm$ 0.5 <sup>Ca</sup>  | 4.8 $\pm$ 0.2 <sup>Ca</sup>   | Sweetener (A)<br>Time (B)<br>A x B | <0.0001<br><0.0001<br><0.0001 |
|                                   | 7                   | 9.4 $\pm$ 0.5 <sup>Aab</sup>  | 12.9 $\pm$ 0.3 <sup>Ba</sup> | 7.8 $\pm$ 1.7 <sup>BCb</sup>  |                                    |                               |
|                                   | 14                  | 7.1 $\pm$ 0.5 <sup>Ab</sup>   | 12.9 $\pm$ 0.9 <sup>Ba</sup> | 11.6 $\pm$ 1.1 <sup>Bab</sup> |                                    |                               |
|                                   | 21                  | 10.2 $\pm$ 0.8 <sup>Ac</sup>  | 41.5 $\pm$ 2.6 <sup>Aa</sup> | 31.9 $\pm$ 7.1 <sup>Ab</sup>  |                                    |                               |
| <b>Water Holding Capacity (%)</b> | 1                   | 95.4 $\pm$ 0.2 <sup>Ba</sup>  | 95.4 $\pm$ 0.5 <sup>Ca</sup> | 95.2 $\pm$ 0.2 <sup>Ca</sup>  | Sweetener (A)<br>Time (B)<br>A x B | <0.0001<br><0.0001<br><0.0001 |
|                                   | 7                   | 90.6 $\pm$ 0.5 <sup>Aab</sup> | 87.1 $\pm$ 0.3 <sup>Ba</sup> | 92.2 $\pm$ 1.7 <sup>BCb</sup> |                                    |                               |
|                                   | 14                  | 92.9 $\pm$ 0.5 <sup>Ab</sup>  | 87.1 $\pm$ 0.9 <sup>Ba</sup> | 88.4 $\pm$ 1.1 <sup>Bab</sup> |                                    |                               |
|                                   | 21                  | 89.8 $\pm$ 0.8 <sup>Ac</sup>  | 58.5 $\pm$ 2.6 <sup>Aa</sup> | 68.1 $\pm$ 7.1 <sup>Ab</sup>  |                                    |                               |

**Table S6.** Syneresis index and water holding capacity (mean  $\pm$  standard deviation) of the low-fat, high-protein yoghurts produced with different sweeteners. Different capital letters within the same column represent statistical differences between storage time for each parameter in the same sweetener. Different small letters within the same row represent statistical differences between sweeteners for each parameter in the same storage time ( $p < 0.05$ ).

| Parameter                         | Storage time (days) | Sucrose 6%                   | Stevia 0.04%                 | Xylitol 6%                   | Honey 6%                     | <i>P-value</i>                     |                               |
|-----------------------------------|---------------------|------------------------------|------------------------------|------------------------------|------------------------------|------------------------------------|-------------------------------|
| <b>Syneresis index (%)</b>        | 1                   | 3.6 $\pm$ 0.4 <sup>Cb</sup>  | 5.7 $\pm$ 0.9 <sup>Da</sup>  | 2.1 $\pm$ 0.3 <sup>Bb</sup>  | 2.8 $\pm$ 0.4 <sup>Bb</sup>  | Sweetener (A)<br>Time (B)<br>A x B | <0.0001<br><0.0001<br><0.0001 |
|                                   | 7                   | 5.0 $\pm$ 0.3 <sup>BCb</sup> | 8.9 $\pm$ 1.8 <sup>Ca</sup>  | 4.1 $\pm$ 0.7 <sup>Ab</sup>  | 5.5 $\pm$ 0.3 <sup>Ab</sup>  |                                    |                               |
|                                   | 14                  | 9.6 $\pm$ 0.7 <sup>Ab</sup>  | 14.0 $\pm$ 1.0 <sup>Ba</sup> | 4.9 $\pm$ 1.5 <sup>Ac</sup>  | 3.1 $\pm$ 0.8 <sup>Bc</sup>  |                                    |                               |
|                                   | 21                  | 5.7 $\pm$ 0.5 <sup>Bb</sup>  | 16.2 $\pm$ 0.7 <sup>Aa</sup> | 4.3 $\pm$ 0.5 <sup>Ab</sup>  | 4.4 $\pm$ 0.2 <sup>ABb</sup> |                                    |                               |
| <b>Water Holding Capacity (%)</b> | 1                   | 96.4 $\pm$ 0.4 <sup>Cb</sup> | 94.3 $\pm$ 0.9 <sup>Da</sup> | 97.9 $\pm$ 0.3 <sup>Bb</sup> | 97.2 $\pm$ 0.4 <sup>Bb</sup> | Sweetener (A)<br>Time (B)<br>A x B | <0.0001<br><0.0001<br><0.0001 |
|                                   | 7                   | 95.0 $\pm$ 0.3 <sup>Cb</sup> | 91.1 $\pm$ 1.8 <sup>Ca</sup> | 95.9 $\pm$ 0.7 <sup>Ab</sup> | 94.5 $\pm$ 0.3 <sup>Ab</sup> |                                    |                               |
|                                   | 14                  | 90.5 $\pm$ 0.7 <sup>Ab</sup> | 86.0 $\pm$ 1.0 <sup>Ba</sup> | 95.1 $\pm$ 1.5 <sup>Ac</sup> | 96.9 $\pm$ 0.8 <sup>Bc</sup> |                                    |                               |
|                                   | 21                  | 94.3 $\pm$ 0.5 <sup>Bb</sup> | 83.8 $\pm$ 0.7 <sup>Aa</sup> | 95.7 $\pm$ 0.5 <sup>Ab</sup> | 95.6 $\pm$ 0.2 <sup>Bb</sup> |                                    |                               |

**Table S7.** Rheological parameters (mean  $\pm$  standard deviation) of the low-fat, low-protein yoghurts produced with different sweeteners. Different capital letters within the same column represent statistical differences between storage time for each parameter in the same sweetener. Different small letters within the same row represent statistical differences between sweeteners for each parameter in the same storage time ( $p < 0.05$ ).

| Parameter                        | Storage time (days) | Sucrose 6%                      | Stevia 0.03%                    | Agave 4.5%                      | <i>P-value</i> |         |
|----------------------------------|---------------------|---------------------------------|---------------------------------|---------------------------------|----------------|---------|
| <b>G' (Pa)</b>                   | 7                   | 231.9 $\pm$ 37.4 <sup>Bb</sup>  | 366.9 $\pm$ 32.5 <sup>Ba</sup>  | 293.9 $\pm$ 8.5 <sup>Bb</sup>   | Sweetener (A)  | <0.0001 |
|                                  | 14                  | 265.7 $\pm$ 44.0 <sup>Ac</sup>  | 460.3 $\pm$ 54.2 <sup>ABa</sup> | 368.4 $\pm$ 39.6 <sup>Ab</sup>  | Time (B)       | <0.0001 |
|                                  | 21                  | 370.7 $\pm$ 6.8 <sup>Ab</sup>   | 504.2 $\pm$ 29.4 <sup>Aa</sup>  | 411.2 $\pm$ 23.0 <sup>Ab</sup>  | A x B          | 0.4287  |
| <b>G'' (Pa)</b>                  | 7                   | 71.2 $\pm$ 10.6 <sup>Bb</sup>   | 106.1 $\pm$ 8.2 <sup>Ba</sup>   | 87.5 $\pm$ 1.8 <sup>Bab</sup>   | Sweetener (A)  | <0.0001 |
|                                  | 14                  | 78.3 $\pm$ 12.9 <sup>Bc</sup>   | 128.0 $\pm$ 13.8 <sup>Aa</sup>  | 105.3 $\pm$ 12.5 <sup>ABb</sup> | Time (B)       | <0.0001 |
|                                  | 21                  | 106.1 $\pm$ 1.7 <sup>Ab</sup>   | 134.8 $\pm$ 9.4 <sup>Aa</sup>   | 115.2 $\pm$ 6.2 <sup>Aab</sup>  | A x B          | 0.3866  |
| <b><math>\eta^*</math> (Pas)</b> | 7                   | 38.6 $\pm$ 6.2 <sup>Bb</sup>    | 60.8 $\pm$ 5.3 <sup>Ba</sup>    | 48.8 $\pm$ 1.4 <sup>Bb</sup>    | Sweetener (A)  | <0.0001 |
|                                  | 14                  | 44.1 $\pm$ 7.3 <sup>Bc</sup>    | 76.0 $\pm$ 8.9 <sup>Aa</sup>    | 61.0 $\pm$ 6.6 <sup>Ab</sup>    | Time (B)       | <0.0001 |
|                                  | 21                  | 61.4 $\pm$ 1.1 <sup>Ab</sup>    | 83.1 $\pm$ 4.9 <sup>Aa</sup>    | 68.0 $\pm$ 3.8 <sup>Ab</sup>    | A x B          | 0.4246  |
| <b>tan <math>\delta</math></b>   | 7                   | 0.307 $\pm$ 0.006 <sup>Aa</sup> | 0.289 $\pm$ 0.004 <sup>Ac</sup> | 0.298 $\pm$ 0.002 <sup>Ab</sup> | Sweetener (A)  | <0.0001 |
|                                  | 14                  | 0.295 $\pm$ 0.003 <sup>Ba</sup> | 0.278 $\pm$ 0.003 <sup>Bb</sup> | 0.286 $\pm$ 0.003 <sup>Bb</sup> | Time (B)       | <0.0001 |
|                                  | 21                  | 0.286 $\pm$ 0.004 <sup>Ca</sup> | 0.267 $\pm$ 0.003 <sup>Cb</sup> | 0.280 $\pm$ 0.003 <sup>Ba</sup> | A x B          | 0.6849  |

**Table S8.** Rheological parameters (mean  $\pm$  standard deviation) of the low-fat, high-protein yoghurts produced with different sweeteners. Different capital letters within the same column represent statistical differences between storage time for each parameter in the same sweetener. Different small letters within the same row represent statistical differences between sweeteners for each parameter in the same storage time ( $p < 0.05$ ).

| Parameter                        | Storage time (days) | Sucrose 6%                       | Stevia 0.04%                     | Xylitol 6%                       | Honey 6%                         | <i>P-value</i> |         |
|----------------------------------|---------------------|----------------------------------|----------------------------------|----------------------------------|----------------------------------|----------------|---------|
| <b>G' (Pa)</b>                   | 7                   | 410.2 $\pm$ 195.4 <sup>Aa</sup>  | 808.2 $\pm$ 178.3 <sup>Aa</sup>  | 619.3 $\pm$ 123.8 <sup>Aa</sup>  | 665.9 $\pm$ 81.3 <sup>Aa</sup>   | Sweetener (A)  | 0.1957  |
|                                  | 14                  | 825.0 $\pm$ 294.6 <sup>ABa</sup> | 1014.4 $\pm$ 343.3 <sup>Aa</sup> | 871.4 $\pm$ 125.2 <sup>Aa</sup>  | 726.7 $\pm$ 172.4 <sup>Aa</sup>  | Time (B)       | 0.0009  |
|                                  | 21                  | 976.8 $\pm$ 177.7 <sup>Aa</sup>  | 1033.3 $\pm$ 121.8 <sup>Aa</sup> | 981.6 $\pm$ 153.4 <sup>Aa</sup>  | 973.4 $\pm$ 324.7 <sup>Aa</sup>  | A x B          | 0.7829  |
| <b>G'' (Pa)</b>                  | 7                   | 120.8 $\pm$ 55.3 <sup>Aa</sup>   | 224.0 $\pm$ 46.7 <sup>Aa</sup>   | 181.8 $\pm$ 37.5 <sup>Aa</sup>   | 195.2 $\pm$ 23.1 <sup>Aa</sup>   | Sweetener (A)  | 0.3056  |
|                                  | 14                  | 235.5 $\pm$ 80.6 <sup>ABa</sup>  | 276.2 $\pm$ 92.4 <sup>Aa</sup>   | 244.8 $\pm$ 30.6 <sup>Aa</sup>   | 201.7 $\pm$ 45.8 <sup>Aa</sup>   | Time (B)       | 0.0022  |
|                                  | 21                  | 267.6 $\pm$ 46.9 <sup>Aa</sup>   | 276.7 $\pm$ 35.5 <sup>Aa</sup>   | 269.9 $\pm$ 42.3 <sup>Aa</sup>   | 266.9 $\pm$ 86.7 <sup>Aa</sup>   | A x B          | 0.7333  |
| <b><math>\eta^*</math> (Pas)</b> | 7                   | 68.0 $\pm$ 32.3 <sup>Ba</sup>    | 133.5 $\pm$ 29.3 <sup>Aa</sup>   | 102.7 $\pm$ 20.6 <sup>Aa</sup>   | 110.5 $\pm$ 13.4 <sup>Aa</sup>   | Sweetener (A)  | 0.202   |
|                                  | 14                  | 136.5 $\pm$ 48.6 <sup>ABa</sup>  | 167.3 $\pm$ 56.6 <sup>Aa</sup>   | 144.1 $\pm$ 20.5 <sup>Aa</sup>   | 155.0 $\pm$ 36.7 <sup>Aa</sup>   | Time (B)       | 0.0009  |
|                                  | 21                  | 161.2 $\pm$ 29.2 <sup>Aa</sup>   | 170.3 $\pm$ 20.2 <sup>Aa</sup>   | 162.0 $\pm$ 25.3 <sup>Aa</sup>   | 160.6 $\pm$ 53.5 <sup>Aa</sup>   | A x B          | 0.7796  |
| <b>tan <math>\delta</math></b>   | 7                   | 0.297 $\pm$ 0.008 <sup>Aa</sup>  | 0.278 $\pm$ 0.004 <sup>Ab</sup>  | 0.293 $\pm$ 0.003 <sup>Aa</sup>  | 0.293 $\pm$ 0.004 <sup>Aa</sup>  | Sweetener (A)  | <0.0001 |
|                                  | 14                  | 0.287 $\pm$ 0.006 <sup>Ba</sup>  | 0.273 $\pm$ 0.001 <sup>ABb</sup> | 0.281 $\pm$ 0.005 <sup>Bab</sup> | 0.278 $\pm$ 0.003 <sup>Bab</sup> | Time (B)       | <0.0001 |
|                                  | 21                  | 0.274 $\pm$ 0.003 <sup>Ca</sup>  | 0.268 $\pm$ 0.003 <sup>Ba</sup>  | 0.275 $\pm$ 0.002 <sup>Ba</sup>  | 0.275 $\pm$ 0.004 <sup>Ba</sup>  | A x B          | 0.2737  |

**Table S9.** Texture parameters (mean  $\pm$  standard deviation) of the low-fat, low-protein yoghurts produced with different sweeteners. Different capital letters within the same column represent statistical differences between storage time for each parameter in the same sweetener. Different small letters within the same row represent statistical differences between sweeteners for each parameter in the same storage time ( $p < 0.05$ ).

| Parameter                 | Storage time (days) | Sucrose 6%                     | Stevia 0.03%                   | Agave 4.5%                     | <i>P-value</i>                     |                              |
|---------------------------|---------------------|--------------------------------|--------------------------------|--------------------------------|------------------------------------|------------------------------|
| <b>Hardness (g)</b>       | 1                   | 13.9 $\pm$ 1.1 <sup>Ca</sup>   | 14.4 $\pm$ 0.2 <sup>Ca</sup>   | 13.1 $\pm$ 0.3 <sup>Ba</sup>   | Sweetener (A)<br>Time (B)<br>A x B | <0.0001<br><0.0001<br>0.1572 |
|                           | 7                   | 15.7 $\pm$ 0.9 <sup>Bb</sup>   | 17.1 $\pm$ 0.4 <sup>Ba</sup>   | 15.8 $\pm$ 0.3 <sup>Aab</sup>  |                                    |                              |
|                           | 14                  | 16.9 $\pm$ 0.8 <sup>Bab</sup>  | 17.9 $\pm$ 0.9 <sup>ABa</sup>  | 16.1 $\pm$ 0.5 <sup>Ab</sup>   |                                    |                              |
|                           | 21                  | 19.2 $\pm$ 2.2 <sup>Aa</sup>   | 18.9 $\pm$ 0.8 <sup>Aa</sup>   | 17.2 $\pm$ 0.7 <sup>Ab</sup>   |                                    |                              |
| <b>Adhesiveness (g.s)</b> | 1                   | -19.1 $\pm$ 1.3 <sup>Db</sup>  | -20.9 $\pm$ 0.7 <sup>Dc</sup>  | -16.9 $\pm$ 0.9 <sup>Da</sup>  | Sweetener (A)<br>Time (B)<br>A x B | <0.0001<br><0.0001<br>0.0009 |
|                           | 7                   | -7.8 $\pm$ 0.9 <sup>Ba</sup>   | -9.1 $\pm$ 1.4 <sup>Ba</sup>   | -8.1 $\pm$ 1.1 <sup>Ba</sup>   |                                    |                              |
|                           | 14                  | -11.6 $\pm$ 0.5 <sup>Ca</sup>  | -11.8 $\pm$ 1.4 <sup>Ca</sup>  | -11.1 $\pm$ 0.4 <sup>Ca</sup>  |                                    |                              |
|                           | 21                  | -4.4 $\pm$ 0.6 <sup>Aa</sup>   | -4.3 $\pm$ 0.4 <sup>Aa</sup>   | -4.1 $\pm$ 0.5 <sup>Aa</sup>   |                                    |                              |
| <b>Springiness</b>        | 1                   | 0.95 $\pm$ 0.01 <sup>Bb</sup>  | 0.94 $\pm$ 0.04 <sup>Bb</sup>  | 0.98 $\pm$ 0.01 <sup>Aa</sup>  | Sweetener (A)<br>Time (B)<br>A x B | 0.0015<br><0.0001<br>0.0072  |
|                           | 7                   | 0.94 $\pm$ 0.01 <sup>Bb</sup>  | 0.96 $\pm$ 0.03 <sup>ABb</sup> | 0.99 $\pm$ 0.00 <sup>Aa</sup>  |                                    |                              |
|                           | 14                  | 0.99 $\pm$ 0.02 <sup>Aa</sup>  | 0.99 $\pm$ 0.00 <sup>Aa</sup>  | 0.99 $\pm$ 0.00 <sup>Aa</sup>  |                                    |                              |
|                           | 21                  | 0.25 $\pm$ 0.02 <sup>Ca</sup>  | 0.24 $\pm$ 0.01 <sup>Ca</sup>  | 0.24 $\pm$ 0.01 <sup>Ba</sup>  |                                    |                              |
| <b>Gumminess (g)</b>      | 1                   | 7.3 $\pm$ 0.5 <sup>Ca</sup>    | 7.4 $\pm$ 0.2 <sup>Ca</sup>    | 6.6 $\pm$ 0.2 <sup>Ba</sup>    | Sweetener (A)<br>Time (B)<br>A x B | <0.0001<br><0.0001<br>0.0969 |
|                           | 7                   | 8.2 $\pm$ 0.6 <sup>Bb</sup>    | 9.1 $\pm$ 0.3 <sup>Ba</sup>    | 8.5 $\pm$ 0.3 <sup>Aab</sup>   |                                    |                              |
|                           | 14                  | 9.5 $\pm$ 0.3 <sup>Aa</sup>    | 9.6 $\pm$ 0.7 <sup>ABa</sup>   | 8.7 $\pm$ 0.2 <sup>Ab</sup>    |                                    |                              |
|                           | 21                  | 10.1 $\pm$ 1.3 <sup>Aa</sup>   | 9.9 $\pm$ 0.5 <sup>Aa</sup>    | 9.0 $\pm$ 0.4 <sup>Ab</sup>    |                                    |                              |
| <b>Cohesiveness</b>       | 1                   | 0.53 $\pm$ 0.03 <sup>ABa</sup> | 0.51 $\pm$ 0.01 <sup>Aa</sup>  | 0.51 $\pm$ 0.02 <sup>Ba</sup>  | Sweetener (A)<br>Time (B)<br>A x B | 0.5552<br>0.0001<br>0.1531   |
|                           | 7                   | 0.52 $\pm$ 0.01 <sup>Ba</sup>  | 0.53 $\pm$ 0.01 <sup>Aa</sup>  | 0.54 $\pm$ 0.01 <sup>Aa</sup>  |                                    |                              |
|                           | 14                  | 0.55 $\pm$ 0.01 <sup>Aa</sup>  | 0.54 $\pm$ 0.01 <sup>Aa</sup>  | 0.54 $\pm$ 0.01 <sup>Aa</sup>  |                                    |                              |
|                           | 21                  | 0.52 $\pm$ 0.02 <sup>Ba</sup>  | 0.53 $\pm$ 0.03 <sup>Aa</sup>  | 0.53 $\pm$ 0.01 <sup>ABa</sup> |                                    |                              |
| <b>Resilience</b>         | 1                   | 0.10 $\pm$ 0.01 <sup>BCa</sup> | 0.11 $\pm$ 0.01 <sup>Aa</sup>  | 0.11 $\pm$ 0.02 <sup>Ba</sup>  | Sweetener (A)<br>Time (B)<br>A x B | 0.1981<br><0.0001<br>0.0080  |
|                           | 7                   | 0.12 $\pm$ 0.01 <sup>Ba</sup>  | 0.10 $\pm$ 0.01 <sup>Aa</sup>  | 0.11 $\pm$ 0.01 <sup>Ba</sup>  |                                    |                              |
|                           | 14                  | 0.10 $\pm$ 0.00 <sup>Ca</sup>  | 0.11 $\pm$ 0.01 <sup>Aa</sup>  | 0.10 $\pm$ 0.00 <sup>Ba</sup>  |                                    |                              |
|                           | 21                  | 0.14 $\pm$ 0.02 <sup>Aa</sup>  | 0.12 $\pm$ 0.01 <sup>Ab</sup>  | 0.13 $\pm$ 0.01 <sup>Aa</sup>  |                                    |                              |

**Table S10.** Texture parameters (mean  $\pm$  standard deviation) of the low-fat, high-protein yoghurts produced with different sweeteners. Different capital letters within the same column represent statistical differences between storage time for each parameter in the same sweetener. Different small letters within the same row represent statistical differences between sweeteners for each parameter in the same storage time ( $p < 0.05$ ).

| Parameter                 | Storage time (days) | Sucrose 6%                      | Stevia 0.04%                   | Xylitol 6%                      | Honey 6%                       | <i>P-value</i>                     |
|---------------------------|---------------------|---------------------------------|--------------------------------|---------------------------------|--------------------------------|------------------------------------|
| <b>Hardness (g)</b>       | 1                   | 33.8 $\pm$ 2.0 <sup>Cb</sup>    | 42.0 $\pm$ 1.6 <sup>Ba</sup>   | 41.8 $\pm$ 1.8 <sup>Ca</sup>    | 35.2 $\pm$ 1.1 <sup>Cb</sup>   | Sweetener (A)<br>Time (B)<br>A x B |
|                           | 7                   | 40.5 $\pm$ 1.2 <sup>Ab</sup>    | 43.6 $\pm$ 1.7 <sup>Ba</sup>   | 44.7 $\pm$ 0.6 <sup>Ba</sup>    | 38.3 $\pm$ 1.3 <sup>Bb</sup>   |                                    |
|                           | 14                  | 40.5 $\pm$ 2.0 <sup>Ab</sup>    | 47.2 $\pm$ 0.9 <sup>Aa</sup>   | 48.3 $\pm$ 3.4 <sup>Aa</sup>    | 40.7 $\pm$ 1.3 <sup>ABb</sup>  |                                    |
|                           | 21                  | 43.0 $\pm$ 1.2 <sup>Bb</sup>    | 47.1 $\pm$ 1.0 <sup>Aa</sup>   | 49.2 $\pm$ 1.0 <sup>Aa</sup>    | 42.5 $\pm$ 1.8 <sup>Ab</sup>   |                                    |
| <b>Adhesiveness (g.s)</b> | 1                   | -3.6 $\pm$ 0.7 <sup>Aa</sup>    | -22.2 $\pm$ 2.0 <sup>Ab</sup>  | -28.9 $\pm$ 0.9 <sup>Bc</sup>   | -22.8 $\pm$ 1.7 <sup>Bb</sup>  | Sweetener (A)<br>Time (B)<br>A x B |
|                           | 7                   | -25.8 $\pm$ 0.8 <sup>BCbc</sup> | -27.3 $\pm$ 1.7 <sup>Bc</sup>  | -20.1 $\pm$ 1.2 <sup>Da</sup>   | -25.3 $\pm$ 1.7 <sup>Cb</sup>  |                                    |
|                           | 14                  | -24.9 $\pm$ 1.3 <sup>Ba</sup>   | -29.4 $\pm$ 1.1 <sup>Cb</sup>  | -33.2 $\pm$ 1.1 <sup>Cc</sup>   | -24.0 $\pm$ 1.6 <sup>BCa</sup> |                                    |
|                           | 21                  | -27.6 $\pm$ 1.6 <sup>Cc</sup>   | -22.0 $\pm$ 1.0 <sup>Ab</sup>  | -22.2 $\pm$ 0.9 <sup>Ab</sup>   | -18.6 $\pm$ 0.3 <sup>Aa</sup>  |                                    |
| <b>Springiness</b>        | 1                   | 0.95 $\pm$ 0.00 <sup>Ac</sup>   | 0.99 $\pm$ 0.00 <sup>Aa</sup>  | 0.98 $\pm$ 0.02 <sup>Aab</sup>  | 0.96 $\pm$ 0.02 <sup>Abc</sup> | Sweetener (A)<br>Time (B)<br>A x B |
|                           | 7                   | 0.96 $\pm$ 0.01 <sup>Aa</sup>   | 0.96 $\pm$ 0.02 <sup>Ba</sup>  | 0.97 $\pm$ 0.03 <sup>Aa</sup>   | 0.96 $\pm$ 0.01 <sup>Aa</sup>  |                                    |
|                           | 14                  | 0.96 $\pm$ 0.01 <sup>Aab</sup>  | 0.95 $\pm$ 0.01 <sup>Bb</sup>  | 0.97 $\pm$ 0.02 <sup>Aab</sup>  | 0.98 $\pm$ 0.02 <sup>Aa</sup>  |                                    |
|                           | 21                  | 0.96 $\pm$ 0.01 <sup>Ab</sup>   | 0.99 $\pm$ 0.01 <sup>Aa</sup>  | 0.98 $\pm$ 0.02 <sup>Aab</sup>  | 0.96 $\pm$ 0.02 <sup>Ab</sup>  |                                    |
| <b>Gumminess (g)</b>      | 1                   | 20.1 $\pm$ 1.5 <sup>Bb</sup>    | 24.4 $\pm$ 2.2 <sup>Aa</sup>   | 23.3 $\pm$ 1.8 <sup>Ba</sup>    | 18.9 $\pm$ 1.3 <sup>Bb</sup>   | Sweetener (A)<br>Time (B)<br>A x B |
|                           | 7                   | 21.7 $\pm$ 1.0 <sup>ABab</sup>  | 23.8 $\pm$ 2.3 <sup>Aa</sup>   | 22.8 $\pm$ 2.1 <sup>Ba</sup>    | 20.6 $\pm$ 1.0 <sup>ABb</sup>  |                                    |
|                           | 14                  | 22.9 $\pm$ 1.4 <sup>Abc</sup>   | 24.2 $\pm$ 1.0 <sup>Aab</sup>  | 26.2 $\pm$ 1.1 <sup>Aa</sup>    | 21.6 $\pm$ 0.7 <sup>Ac</sup>   |                                    |
|                           | 21                  | 23.1 $\pm$ 0.7 <sup>Ab</sup>    | 25.2 $\pm$ 0.6 <sup>Aa</sup>   | 25.8 $\pm$ 0.6 <sup>Aa</sup>    | 21.8 $\pm$ 1.1 <sup>Ab</sup>   |                                    |
| <b>Cohesiveness</b>       | 1                   | 0.60 $\pm$ 0.05 <sup>Aa</sup>   | 0.54 $\pm$ 0.01 <sup>Ab</sup>  | 0.56 $\pm$ 0.02 <sup>Aab</sup>  | 0.55 $\pm$ 0.01 <sup>Ab</sup>  | Sweetener (A)<br>Time (B)<br>A x B |
|                           | 7                   | 0.54 $\pm$ 0.01 <sup>Ba</sup>   | 0.55 $\pm$ 0.05 <sup>Aa</sup>  | 0.51 $\pm$ 0.04 <sup>Ba</sup>   | 0.54 $\pm$ 0.01 <sup>Aa</sup>  |                                    |
|                           | 14                  | 0.57 $\pm$ 0.05 <sup>ABa</sup>  | 0.51 $\pm$ 0.02 <sup>Ab</sup>  | 0.53 $\pm$ 0.02 <sup>ABab</sup> | 0.53 $\pm$ 0.02 <sup>Aab</sup> |                                    |
|                           | 21                  | 0.54 $\pm$ 0.01 <sup>Ba</sup>   | 0.54 $\pm$ 0.01 <sup>Aa</sup>  | 0.52 $\pm$ 0.02 <sup>ABa</sup>  | 0.55 $\pm$ 0.02 <sup>Aa</sup>  |                                    |
| <b>Resilience</b>         | 1                   | 0.10 $\pm$ 0.01 <sup>Aa</sup>   | 0.10 $\pm$ 0.00 <sup>Aa</sup>  | 0.10 $\pm$ 0.01 <sup>Aa</sup>   | 0.09 $\pm$ 0.01 <sup>Aa</sup>  | Sweetener (A)<br>Time (B)<br>A x B |
|                           | 7                   | 0.09 $\pm$ 0.00 <sup>Aa</sup>   | 0.09 $\pm$ 0.00 <sup>Ba</sup>  | 0.09 $\pm$ 0.01 <sup>Ba</sup>   | 0.09 $\pm$ 0.01 <sup>Aa</sup>  |                                    |
|                           | 14                  | 0.09 $\pm$ 0.01 <sup>Aa</sup>   | 0.09 $\pm$ 0.00 <sup>ABa</sup> | 0.09 $\pm$ 0.01 <sup>ABa</sup>  | 0.09 $\pm$ 0.01 <sup>Aa</sup>  |                                    |
|                           | 21                  | 0.09 $\pm$ 0.01 <sup>Aab</sup>  | 0.09 $\pm$ 0.01 <sup>ABa</sup> | 0.09 $\pm$ 0.01 <sup>ABab</sup> | 0.08 $\pm$ 0.01 <sup>Ab</sup>  |                                    |

**Table S11.** Sensorial analysis results (mean  $\pm$  standard deviation) regarding flavor, taste, consistency, and appearance of the yoghurts produced with low-protein (LP) and high-protein (HP) and different sweeteners. Different small letters within the same row represent statistical differences between sweetened yoghurts for each parameter ( $p < 0.05$ ).

| Parameter          | Sucrose 6%<br>(LP)          | Stevia 0.03%<br>(LP)        | Agave 4.5%<br>(LP)         | Sucrose 6%<br>(HP)          | Stevia 0.04%<br>(HP)        | Xylitol 6%<br>(HP)          | Honey 6%<br>(HP)             | <i>P-value</i> |
|--------------------|-----------------------------|-----------------------------|----------------------------|-----------------------------|-----------------------------|-----------------------------|------------------------------|----------------|
| <b>Flavor</b>      | 6.6 $\pm$ 1.2 <sup>ab</sup> | 7.0 $\pm$ 1.5 <sup>a</sup>  | 5.8 $\pm$ 1.4 <sup>b</sup> | 6.9 $\pm$ 1.4 <sup>a</sup>  | 6.7 $\pm$ 1.7 <sup>ab</sup> | 6.6 $\pm$ 1.2 <sup>ab</sup> | 7.0 $\pm$ 1.3 <sup>a</sup>   | 0.0200         |
| <b>Taste</b>       | 5.8 $\pm$ 1.4 <sup>de</sup> | 8.0 $\pm$ 0.9 <sup>a</sup>  | 5.1 $\pm$ 1.7 <sup>e</sup> | 7.5 $\pm$ 0.9 <sup>ab</sup> | 6.4 $\pm$ 1.5 <sup>cd</sup> | 6.9 $\pm$ 1.2 <sup>bc</sup> | 6.8 $\pm$ 1.4 <sup>bcd</sup> | <0.0001        |
| <b>Consistency</b> | 6.1 $\pm$ 1.5 <sup>c</sup>  | 6.7 $\pm$ 1.8 <sup>bc</sup> | 6.5 $\pm$ 1.5 <sup>c</sup> | 8.0 $\pm$ 1.0 <sup>a</sup>  | 7.6 $\pm$ 1.5 <sup>ab</sup> | 7.8 $\pm$ 1.1 <sup>a</sup>  | 7.7 $\pm$ 1.4 <sup>ab</sup>  | <0.0001        |
| <b>Appearance</b>  | 6.8 $\pm$ 1.6 <sup>b</sup>  | 7.0 $\pm$ 1.5 <sup>b</sup>  | 6.9 $\pm$ 1.4 <sup>b</sup> | 8.0 $\pm$ 0.8 <sup>a</sup>  | 7.8 $\pm$ 1.3 <sup>ab</sup> | 8.1 $\pm$ 0.8 <sup>a</sup>  | 7.8 $\pm$ 1.6 <sup>ab</sup>  | <0.0001        |
